# Supplementary material
Source: publisher figshare collection journal article supplement (https://acs.figshare.com/ndownloader/files/3778831)
Supplement: Supplementary file 1 [file 3778831]

## Supporting Information

### Oxygen Reduction Mechanism of Monometallic Rhodium Hydride Complexes

Robert L. Halbach,<sup>a,b</sup> Thomas S. Teets,<sup>a</sup> and Daniel G. Nocera<sup>\*a,b</sup>

<sup>a</sup> Department of Chemistry, Massachusetts Institute of Technology, 77 Massachusetts Avenue, Cambridge, MA 02139-4307. <sup>b</sup> Department of Chemistry and Chemical Biology, Harvard University, 12 Oxford Street, Cambridge, MA 02138-2902. <sup>c</sup> Department of Chemistry, University of Houston, 112 Fleming Building Houston, Texas 77204-5003, United States

Email: [dnocera@fas.harvard.edu](mailto:dnocera@fas.harvard.edu)

| <i>Index</i>                                                                     | <i>Page</i> |
|----------------------------------------------------------------------------------|-------------|
| <b>Figures S1–S4.</b> Electronic absorption spectra of <b>1a-d</b>               | S2          |
| <b>Figures S5–S8.</b> Overlaid electronic absorption spectra of <b>2a-d/3a-d</b> | S4          |
| <b>Figures S9–S12.</b> Electronic absorption spectra of <b>4a-d</b>              | S6          |
| <b>Table S1.</b> Rate constants for Eq. (6)                                      | S8          |

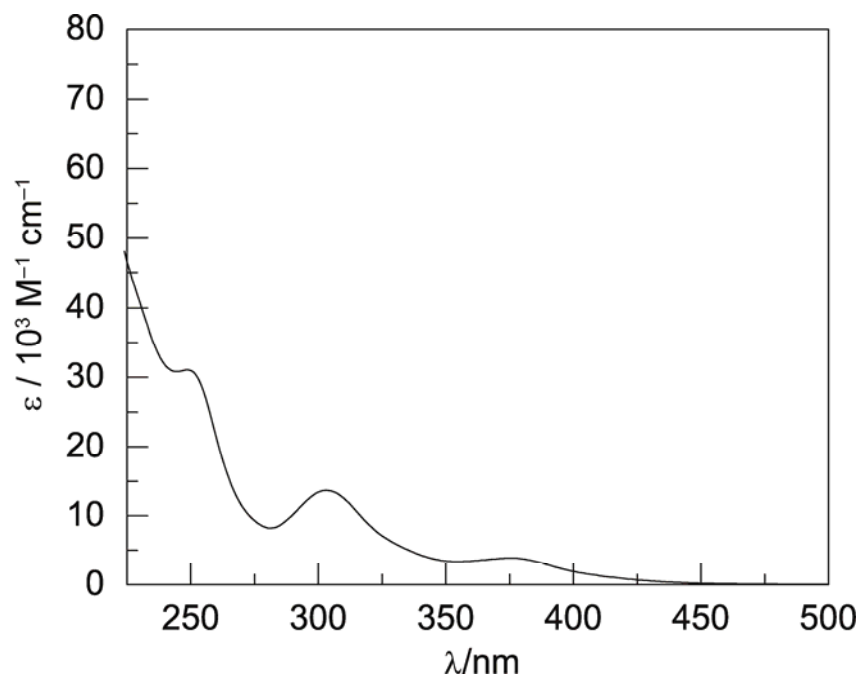

**Figure S1.** Electronic absorption spectrum of **1a** recorded at 293 K in THF.

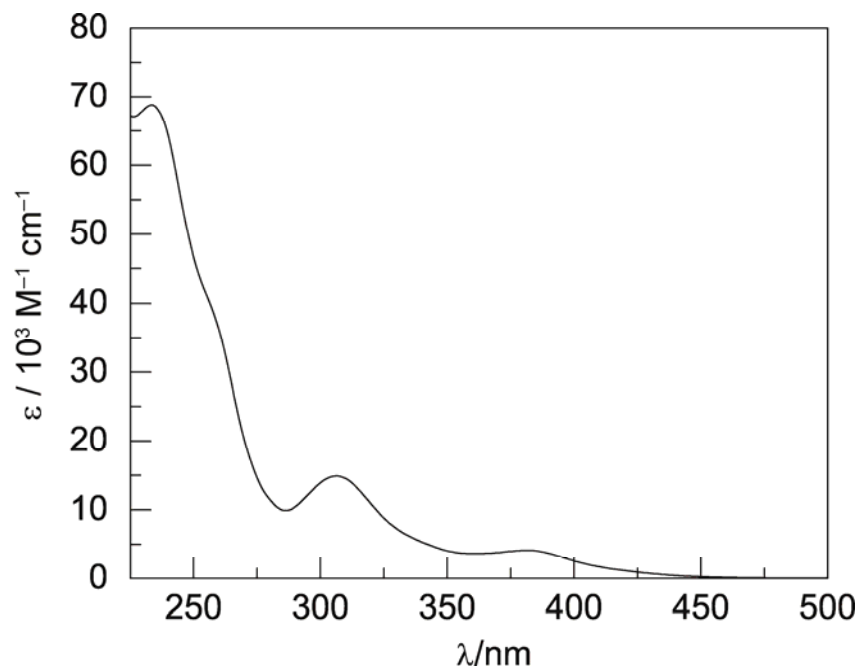

**Figure S2.** Electronic absorption spectrum of **1b** recorded at 293 K in THF.

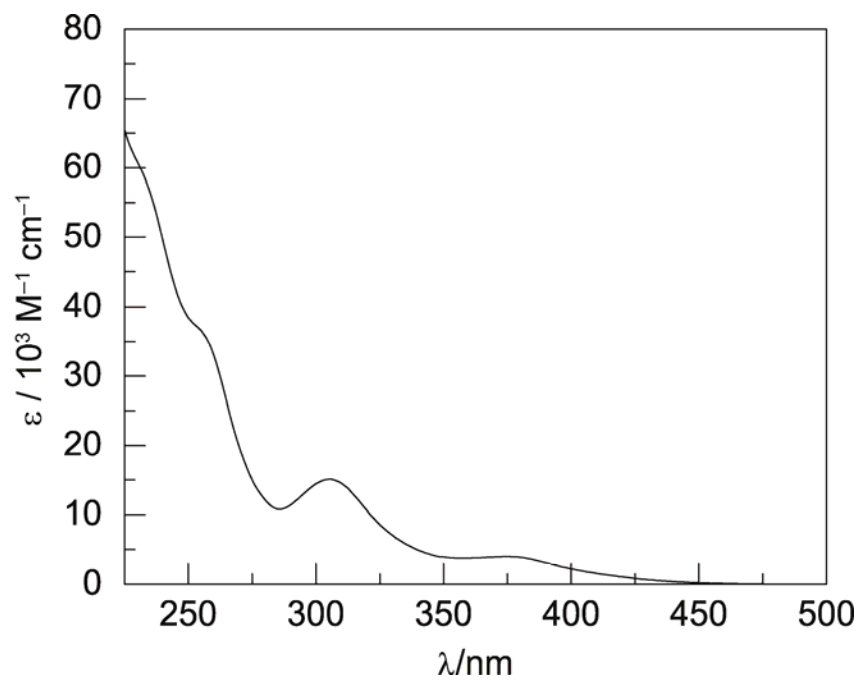

**Figure S3.** Electronic absorption spectrum of **1c** recorded at 293 K in THF.

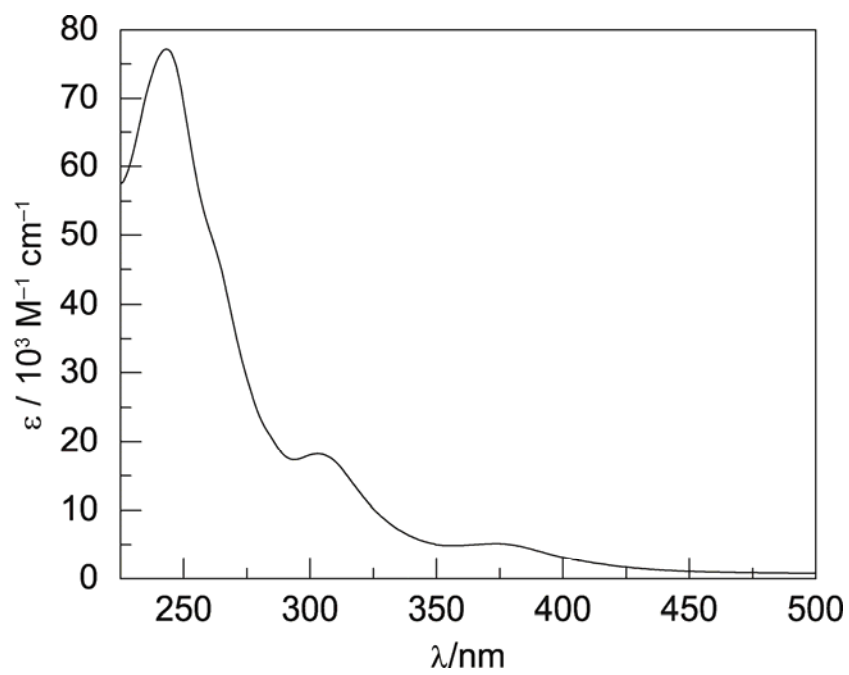

**Figure S4.** Electronic absorption spectrum of **1d** recorded at 293 K in THF.

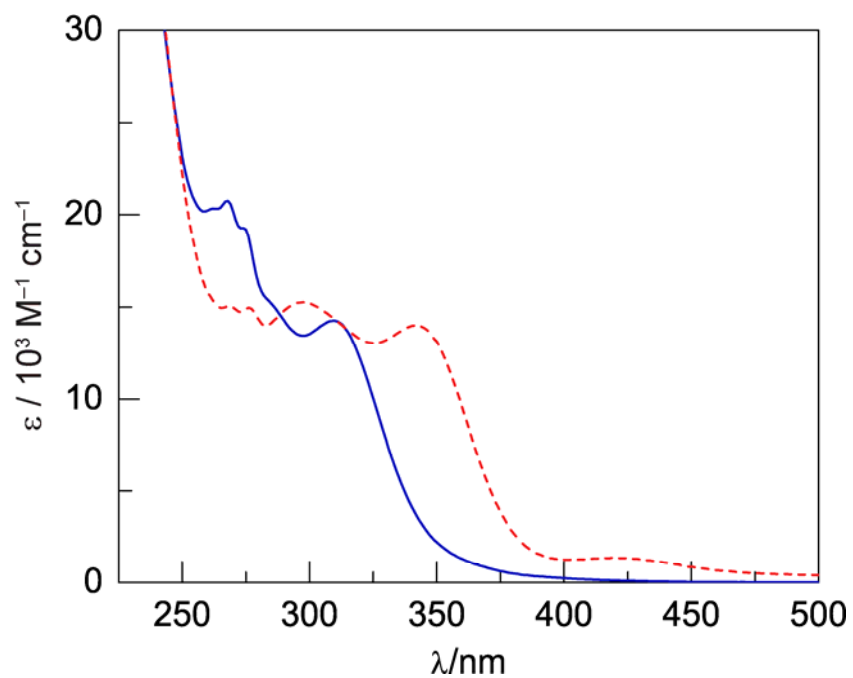

**Figure S5.** Overlaid electronic absorption spectra of **2a** (—) and **3a** (---) recorded at 293 K in THF.

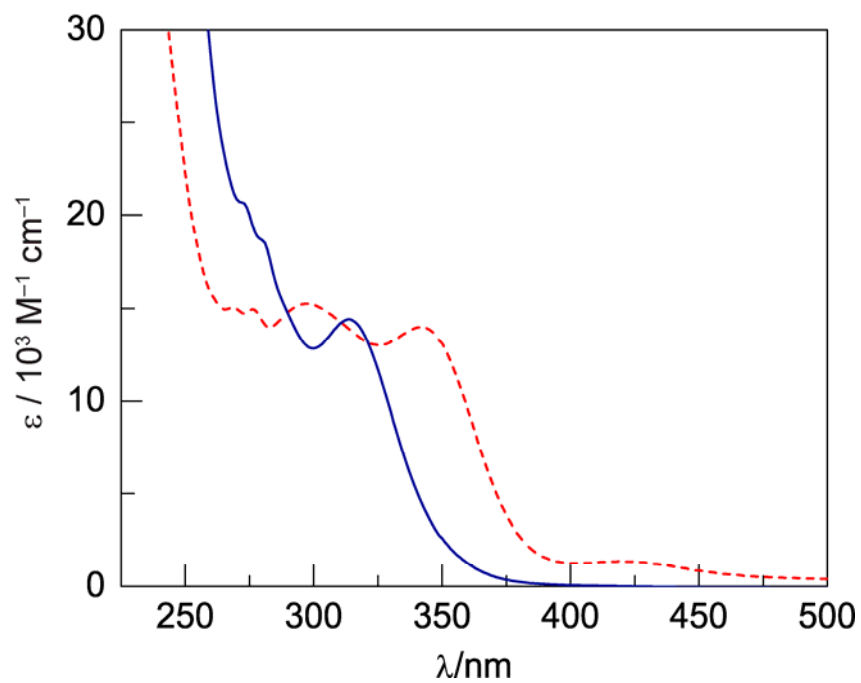

**Figure S6.** Overlaid electronic absorption spectra of **2b** (—) and **3b** (---) recorded at 293 K in THF.

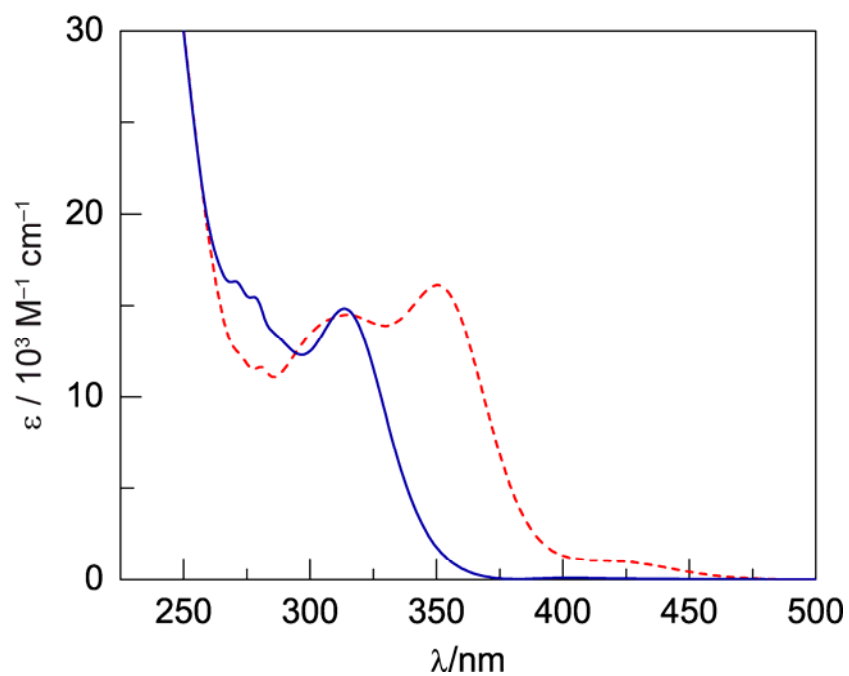

**Figure S7.** Overlaid electronic absorption spectra of **2c** (—) and **3c** (---) recorded at 293 K in THF.

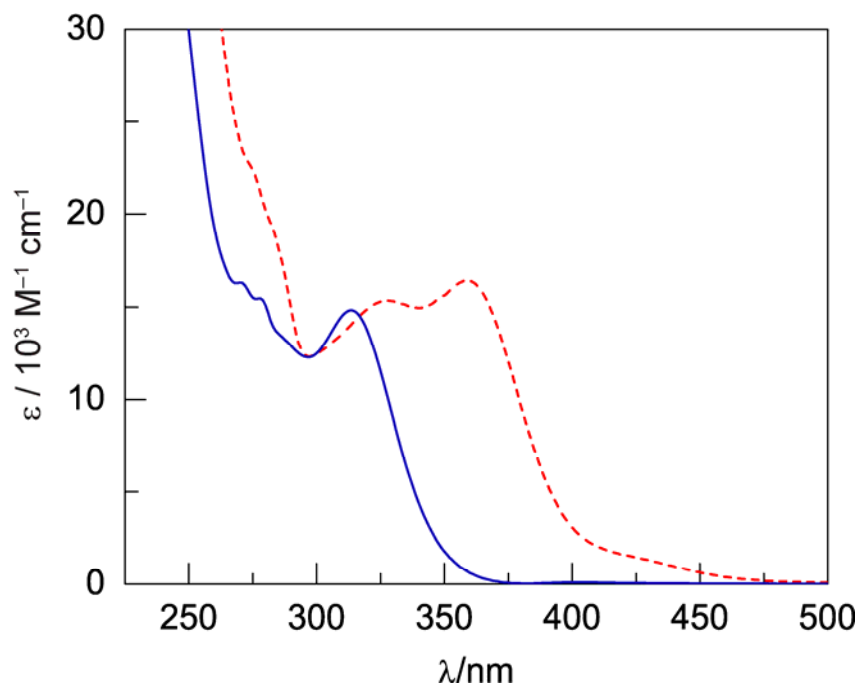

**Figure S8.** Overlaid electronic absorption spectra of **2d** (—) and **3d** (---) recorded at 293 K in THF.

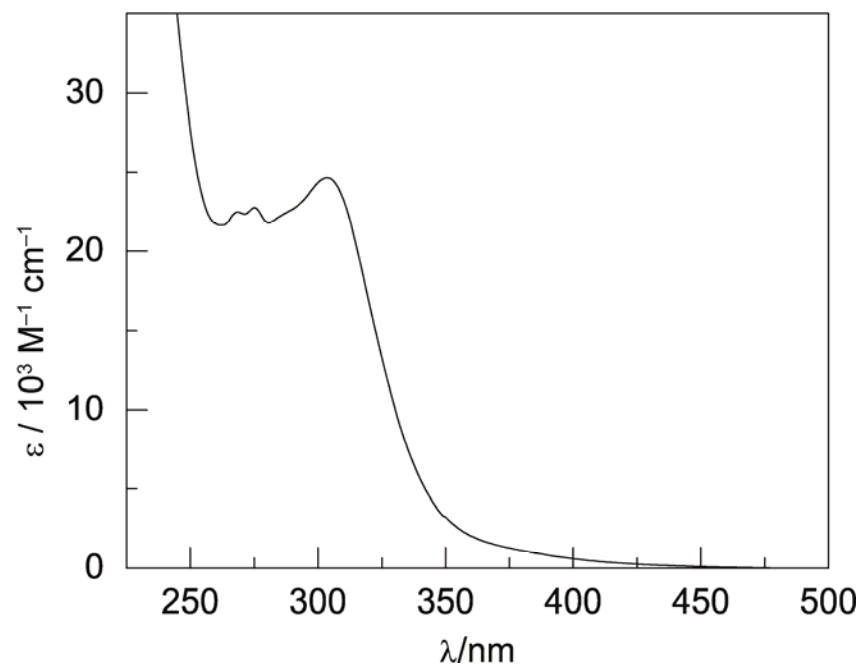

**Figure S9.** Electronic absorption spectrum of **4a** recorded at 293 K in THF.

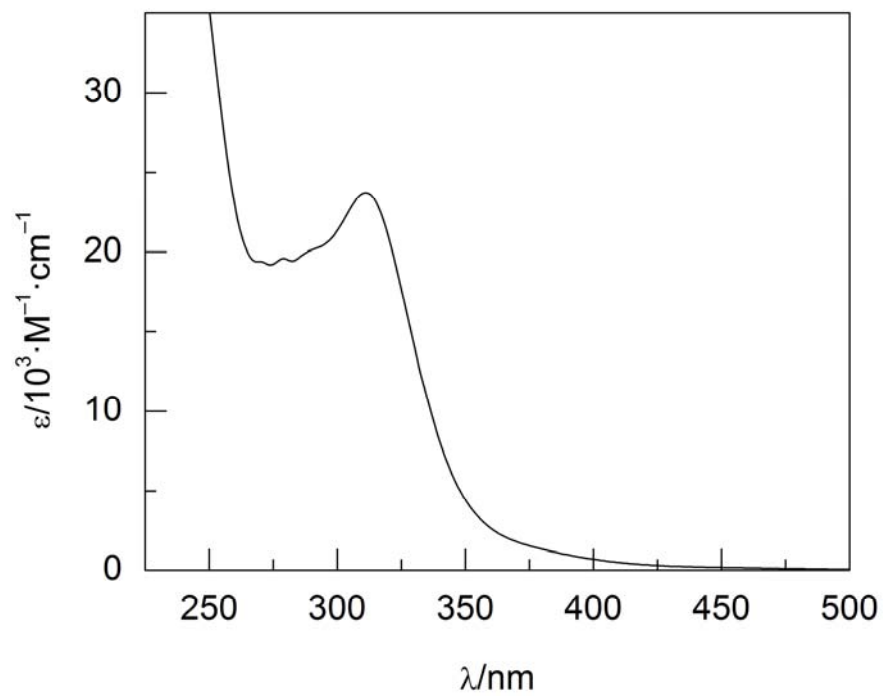

**Figure S10.** Electronic absorption spectrum of **4b** recorded at 293 K in THF.

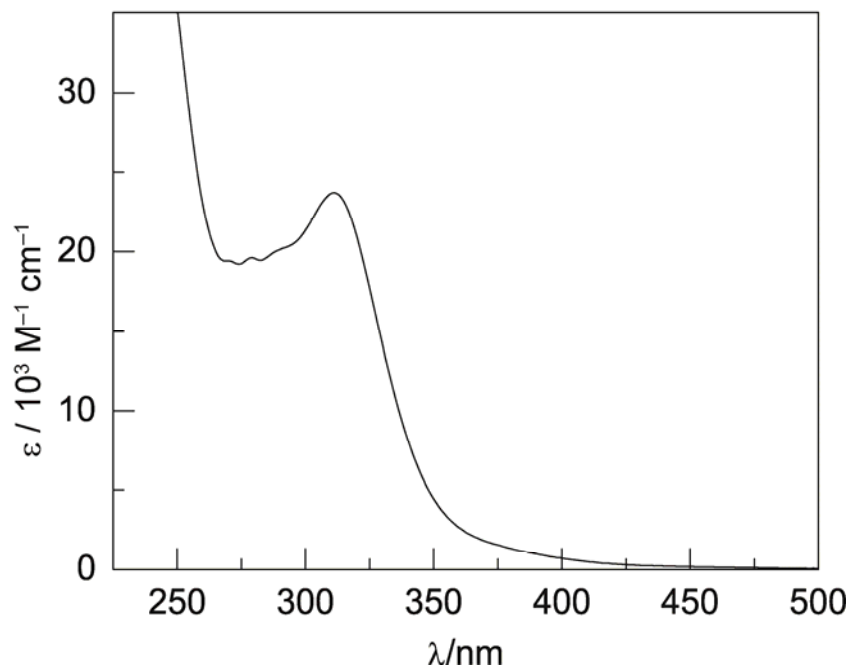

**Figure S11.** Electronic absorption spectrum of **4c** recorded at 293 K in THF.

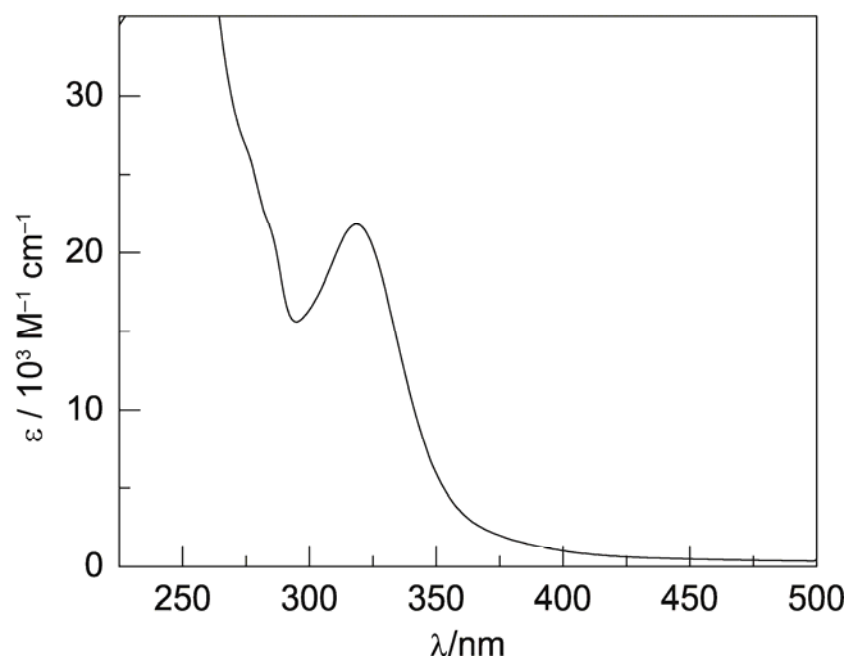

**Figure S12.** Electronic absorption spectrum of **4d** recorded at 293 K in THF.

**Table S1.** Rate constants, as defined by Eq. (6), for the reaction of **2** with HCl and O<sub>2</sub>.

| X   | $k_1/\text{min}^{-1} \text{ atm}^{-1} \text{ M}^a$ | $[\text{HCl}]^{-1}/\text{M}^{-1}$ | $k_1^{\text{HCl}}/\text{min}^{-1} \text{ atm}^{-1} \text{ a,b}$ | $k_1'/\text{min}^{-1} \text{ atm}^{-1} \text{ a}$ |
|-----|----------------------------------------------------|-----------------------------------|-----------------------------------------------------------------|---------------------------------------------------|
| F   | $0.0355 \pm 0.0003$                                | 8.3                               | $0.29 \pm 0.002$                                                | 0.029                                             |
|     |                                                    | 11                                | $0.39 \pm 0.003$                                                |                                                   |
|     |                                                    | 17                                | $0.60 \pm 0.005$                                                |                                                   |
|     |                                                    | 33                                | $1.17 \pm 0.01$                                                 |                                                   |
| Cl  | $0.035 \pm 0.001$                                  | 8.3                               | $0.29 \pm 0.01$                                                 | 0.07                                              |
|     |                                                    | 11                                | $0.39 \pm 0.01$                                                 |                                                   |
|     |                                                    | 17                                | $0.60 \pm 0.02$                                                 |                                                   |
|     |                                                    | 33                                | $1.16 \pm 0.03$                                                 |                                                   |
| Me  | $0.0194 \pm 0.0009$                                | 8.3                               | $0.16 \pm 0.01$                                                 | 0.11                                              |
|     |                                                    | 11                                | $0.21 \pm 0.02$                                                 |                                                   |
|     |                                                    | 17                                | $0.33 \pm 0.02$                                                 |                                                   |
|     |                                                    | 33                                | $0.64 \pm 0.03$                                                 |                                                   |
| OMe | $0.0160 \pm 0.0004$                                | 8.3                               | $0.13 \pm 0.003$                                                | 0.03                                              |
|     |                                                    | 11                                | $0.18 \pm 0.004$                                                |                                                   |
|     |                                                    | 17                                | $0.27 \pm 0.01$                                                 |                                                   |
|     |                                                    | 33                                | $0.53 \pm 0.01$                                                 |                                                   |
